# Supplementary material for: Insights on ozone pollution control in urban areas by decoupling meteorological factors based on machine learning
Source: Copernicus journal article supplement (doi:10.5194/egusphere-2024-1576), 2024-07-01
Supplement: Supplementary file [file egusphere-2024-1576-AC1-supplement.pdf]

## Response to Reviewer #1

### *General comments*

*The manuscript titled “Insights on ozone pollution control in urban areas by decoupling meteorological factors based on machine learning” uses a machine learning method to decouple the meteorological effects on concentrations of O<sub>3</sub> and its precursors. This method provides better understanding of O<sub>3</sub> precursor sensitivity and sources of VOCs. The article is well organized. It can be accepted after considering the following suggestions.*

### **Response:**

We would like to express our gratitude to Reviewer #1 for their thorough review of our manuscript and for their valuable and constructive comments. We have carefully revised the manuscript in accordance with the reviewer’s suggestions. Below, we provide point-by-point responses to the reviewer’s comments. The reviewer’s questions are presented in italics, while our responses are in standard font. The corresponding revisions to the manuscript are highlighted in blue. All changes to the original submission are tracked in the revised manuscript. Finally, we would like to once again thank the reviewer for their positive remarks.

### *Comments*

*1. Line 15: The term “atmospheric environment capacity” sounds weird.*

### **Response:**

We apologize for the unclear wording in our previous statement. What we intended to express was “atmospheric capacity” or “air quality capacity”, referring to the maximum amount of pollutants that the atmosphere in a specific area can purify. We've revised the following sentence for a more natural and widely accepted phrasing:

When meteorological conditions deteriorate, the atmosphere's capacity to cleanse pollutants decreases, leading to the accumulation of air pollutants.

*2. Line 81-83: This statement is not justified. The emission reduction policies do not necessarily rely on the two methods, and other methods such as air quality model can also provide basis.*

### **Response:**

We apologize for the previous overly definitive statement and have revised the paragraph as follows: The observation-based model (OBM), positive matrix factorization model (PMF), and air quality model are commonly used to analyze the causes of O<sub>3</sub> pollution and provide theoretical support for reducing O<sub>3</sub> precursors. However, the results of OBM and PMF, which rely on observed data, may be influenced by fluctuations in meteorological conditions, potentially introducing bias.

*3. Lines 107-109: How to measure these meteorological factors should be given.*

### **Response:**

Thanks to the reviewer's comments, we have added the measurement information of meteorological factors:

The meteorological parameters measured included temperature (T), relative humidity (RH), atmospheric pressure (P), wind speed (WS), and wind direction (WD), which were measured by the WS500-UMB instrument manufactured by LUFFT Corporation.

4. Line 130: the "cluster" should be explained here.

**Response:**

We appreciate the reviewer's comments. We have added the following description when we first mention "cluster" on line 115:

Cluster of backward trajectories were widely employed to represent the main directions of air masses at monitoring sites (Song et al., 2021).

5. Lines 131-132: From my understanding, the variable "trend" just characterize the date and hour. Why does it relate to the implementation of policy measures?

**Response:**

We appreciate the reviewer's comments. We used the term "trend" to capture the long-term changes in emission sources, which were closely related to activity levels. Environmental regulations and policies aimed at reducing pollutant emissions were implemented during specific time periods, and the effects of these measures required time to manifest. Therefore, the "trend" not only reflected the changes in emission source intensity but also represented the long-term variation in air pollutants caused by the enforcement of policies and regulations. (Carslaw and Taylor, 2009; Vu et al., 2019). We have added the following description in the manuscript:

The parameter 'trend' can indicate the long-term changes of air pollutants concentrations resulting from the implementation of policy measures (Vu et al., 2019). Environmental regulations and policies aimed at reducing pollutant emissions were implemented during specific periods, and their effects became apparent in the long-term trends. Therefore, the "trend" not only reflected changes in emission sources closely related to activity levels but also represented the long-term variations in air pollutants caused by the enforcement of policies and regulations. The parameter 'trend' was calculated as Eq. (1):

6. Line 137-138: It is better to randomly split the data into ten subsets, and randomly use nine of them for training and the rest one for testing.

**Response:**

Thanks to the reviewer's comments. In this paper, we used 80% of the data as the training set and 20% as the testing set. This method has been widely applied in many studies and has proven to be effective (Grange et al., 2018; Liu et al., 2022a). The 10-fold cross-validation you mentioned could further enhance the reliability of model evaluation, and we will consider using this approach for data analysis in future research. Thank you once again for your suggestion.

7. Line 125: For the performance of the random forest model, which variables are response variable and which are predictors should be clarified.

**Response:**

We appreciate the reviewer's comments. We have specified which variables are response variables and which are predictor variables:

In the RF model, the air pollutants were the response variables, while the explanatory variables included time variables representing source emissions and meteorological variables representing physical and chemical processes.

8. Line 141: Different VOCs species has different lifetime. Some VOCs with low reactivity have longer

*lifetime, which can go through regional transport. The difference among different VOCs species should be considered.*

**Response:**

Thanks to the reviewer's comments The point you raised about the varying lifetimes of different VOCs is indeed important. We included the cluster representing long-range transport as an explanatory variable in the RF model for NMHCs and several VOCs with different lifetimes. The results showed that the feature importance of the cluster was the lowest, ranging from 0.5% to 1.2%. The importance of cluster for acetylene, a long-lived compound, was 1.2%, while for ethylene, a short-lived compound, it was 0.5%. For NMHCs, the cluster importance was 1%. Compared to O<sub>3</sub>, the impact of the cluster on VOCs was insignificant. The uncertainty of the cluster's impact on VOCs was approximately 1%. Within this margin of error, we approximated that VOCs were primarily influenced by dispersion effects. We have added the following clarification to the manuscript:

To take into consideration that some NMHCs have relatively long lifetimes (such as acetylene), the cluster was incorporated as an explanatory variable in the RF model. For NMHCs with different lifetimes, the feature importance of the cluster was relatively low (around 1%). Therefore, it can be approximated that NMHCs were primarily influenced by dispersion effects within the uncertainty.

*9. Lines 144-145: Which time periods are selected for the resampling? The whole four years or the month to which the investigated day belongs to? This should be clarified.*

**Response:**

We appreciate the reviewer's suggestion. We have clarified the resampling period, and the revised sentence is as follows:

The resampling of meteorological variables was conducted over the two-week period before and after the selected date, with the resampled hours remaining constant. This approach effectively preserved the seasonal and diurnal variations in the response variables (Vu et al., 2019).

*10. Line 187: I suggest to give some quantitative description of the consistency.*

**Response:**

We appreciate the reviewer's suggestion. We have given some quantitative description of the consistency, and the revised sentence is as follows:

After meteorological normalization, MDA8 O<sub>3</sub> significantly decreased in 2020, followed by a slight increase in 2021 and 2022. The observed annual variation in MDA8 O<sub>3</sub> exhibited a similar trend. The meteorologically normalized annual mean MDA8 O<sub>3</sub> in 2020 decreased by 10% compared to 2019, which aligned with the observed change of -8.7%. Based on both meteorologically normalized and observed results, the concentrations of NO<sub>2</sub> and NMHCs showed declining trends, with a significant decrease in 2022. Compared to 2019, the meteorologically normalized concentrations of NO<sub>2</sub> and NMHCs in 2022 decreased by 46.1% and 24%, respectively, while the observed concentrations of NO<sub>2</sub> and NMHCs decreased by 45.7% and 16%, respectively.

*11. Line 190: "From the diurnal trends of NO<sub>2</sub> and NMHCs," sounds weird.*

**Response:**

We appreciate the reviewer's comments. We have revised the sentence to the following:

From the diurnal variation of NO<sub>2</sub> and NMHCs concentrations.

12. Line 207: "And" is redundant.

**Response:**

We appreciate the reviewer's comments. We have deleted it.

13. Lines 205-210: *O<sub>3</sub> concentrations can affect the nighttime NO<sub>2</sub> and VOCs by titration and ozonolysis reactions of alkenes. How do you evaluate it?*

**Response:**

We appreciate the reviewer's comments. O<sub>3</sub> can react with NO to produce NO<sub>2</sub>, which leads to an increase in nighttime NO<sub>2</sub> concentrations. From the diurnal variation of observed O<sub>3</sub> and NO<sub>2</sub>, it can be seen that the nighttime O<sub>3</sub> concentration decreased, the corresponding NO<sub>2</sub> concentration increased. High concentrations of alkenes can produce Criegee intermediates (CIs) through ozonolysis, which can rapidly decompose into a large number of radicals, facilitating the oxidation of VOCs and participating in radical cycling reactions, ultimately promoting O<sub>3</sub> formation. However, this reaction is more importance in areas with high alkene emissions, such as petrochemical regions (Yang et al., 2024). In this study, the concentration of alkenes is below 10 ppb, so the impact of this reaction is minimal.

14. Fig. 2. *How to evaluate the importance of different features should be depicted in the Method.*

**Response:**

We appreciate the reviewer's suggestion. We have added the following explanation in the Method:

Feature importance was used to reflect the overall significance of explanatory variables in the RF model. The importance was typically represented as an array, where each value corresponded to the importance score of a specific feature. These scores usually range from 0 to 1. The higher importance score indicated that the feature had a stronger predictive capability for the response variable.

15. Line 215: *the reason why the time variables can represent anthropogenic emissions should be clarified.*

**Response:**

We appreciate the reviewer's comments. We have added the following clarification:

Time variables were closely related to the periodic changes in human activities. For example, weekdays versus weekends and peak versus non-peak hours corresponded to different levels of anthropogenic emissions. Anthropogenic emissions influenced the seasonal variations of atmospheric pollutants, as seen in winter heating effects. Previous studies also used time variables to represent anthropogenic emissions (Dai et al., 2023; Vu et al., 2019).

16. Line 226-227: *This reaction will cause more production of OH, which will increase O<sub>3</sub> production. So this probably cannot explain the negative correlation between RH and O<sub>3</sub>. Higher RH generally corresponds to more cloud and precipitation, causing lower O<sub>3</sub> concentrations. The reason for the negative correlation should be double checked.*

**Response:**

We appreciate the reviewer for pointing out this key issue. We have removed the explanation related to "HO<sub>x</sub> chemical reactions" and revised it to the following statement:

Higher relative humidity was usually associated with a higher cloud cover, and relative humidity was generally negatively correlated with O<sub>3</sub> (Liu et al., 2023).

17. Line 227-229: *In fact, reaction rates does not necessarily increased with temperature increasing. In fact, many important reactions such as NO<sub>2</sub>+OH and some VOCs+OH will get slower with higher temperature.*

*Temperature not only affects chemical reactions and precursors emissions, but also affects physical processes. How do you isolate the physical effects?*

**Response:**

We apologize for the unclear expression. We have revised it to the following statement:

High temperatures increased the rate of most chemical reactions in the atmosphere, especially photochemical reactions that lead to O<sub>3</sub> formation.

Additionally, the reviewer's important point that "Temperature not only affects chemical reactions and precursor emissions, but also affects physical processes" is very meaningful. In this study, temperature was primarily used as an indicator of chemical reactions. In our machine learning approach, we used the parameters that more directly affect physical processes, such as WS, WD, and BLH. Therefore, we mainly considered the influence of temperature on chemical reactions. The reviewer's question is something we should further contemplate. Thank you once again for your comments.

18. Line 281: *The term "locally generated O<sub>3</sub>" should be defined or explained here.*

**Response:**

We appreciate the reviewer's comments. We have included the definition of locally generated O<sub>3</sub>. Locally generated O<sub>3</sub> was produced in the atmosphere through photochemical reactions involving VOCs and nitrogen oxides NO<sub>x</sub> (Song et al., 2021).

19. Line 323: *"...more slowly" this description is not clear. Higher value of the turning point indicates the real NO<sub>x</sub> concentrations is more likely lower than this value, suggesting a higher possibility to be in the NO<sub>x</sub>-limited regime.*

**Response:**

We appreciate the reviewer's comments. We have revised the sentence as follows:

In other words, a higher NO<sub>2</sub> value at the turning point suggested a greater likelihood that the actual NO<sub>x</sub> concentration was below that value, indicating a higher probability of being in a NO<sub>x</sub>-limited regime.

20. Line 327: *The transitional regime is not defined here. Do you mean the turning points is transitional regime?*

**Response:**

We appreciate the reviewer's comments. We have added the definition as follows:

The transition regime referred to the region near the turning point, where O<sub>3</sub> formation was sensitive to changes in both VOCs and NO<sub>x</sub>.

21. Figure 5. *The relationship between O<sub>3</sub> and NO<sub>2</sub> and the turning point are acquired from the normalized O<sub>3</sub> and NO<sub>2</sub>. However, it seems that the average values of NO<sub>2</sub> for each year are acquired from the observed values, rather than the normalized values. The reason for the inconsistency should be clarified.*

**Response:**

We appreciate the reviewer's comments. We apologize for any misunderstanding. In lines 312-314, we

described the data sources for Figure 5. All the data in the left panel of Figure 5 were based on observed data, including the annual average O<sub>3</sub> values (blue triangles). While all the data in the right panel were derived from meteorologically normalized data, with the annual average O<sub>3</sub> values also calculated from the meteorologically normalized data. The small differences observed after annual averaging may have contributed to the misunderstanding. We have further added the following description:

The relationship between O<sub>3</sub> and NO<sub>2</sub> under long-term trends was analyzed based on the observed (left) and meteorologically normalized (right) data (Fig. 5). The red dotted line showed the turning point of the relationship between O<sub>3</sub> and NO<sub>2</sub> concentrations. The blue triangle represented the average value of the MDA8 O<sub>3</sub> during the warm season each year.

22. *Figure 5 and Figure 6. In Figure 5 O<sub>3</sub> sensitivity shifts from a VOC-limited regime to a NOx-limited regime, while in Figure 6, this shift is toward inverse direction. The contradiction should be explained.*

**Response:**

We appreciate the reviewer's comments. Figure 5 presented a long-term analysis of O<sub>3</sub> formation sensitivity, showing that the annual O<sub>3</sub> formation sensitivity located in the VOC-limited regime after meteorological normalization. The corresponding NO<sub>2</sub> concentration is higher when entering the VOC-limited regime, indicating that under low NO<sub>x</sub> conditions, it continued to be in the NO<sub>x</sub>-limited regime. Figure 6 illustrated the O<sub>3</sub> sensitivity analysis during a pollution event, revealing that the O<sub>3</sub> formation sensitivity during the event shifted towards the transition regime between VOC- and NO<sub>x</sub>-limited regimes after meteorological normalization. This implied that during O<sub>3</sub> pollution event, coordinated control of both VOCs and NO<sub>x</sub> was necessary. O<sub>3</sub> formation sensitivity varied between long-term and short-term pollution events.

23. *Figure 6. How do you judge that O<sub>3</sub> sensitivity shifts from NOx-limited regime to transition regime? It seems that it is in a NOx-limited regime for both cases.*

**Response:**

We appreciate the reviewer's comments. We have made the following adjustments:

Based on the observation results, the O<sub>3</sub> formation in pollution was located in the strict NO<sub>x</sub>-limited regime. After meteorological normalization, O<sub>3</sub> formation shifted towards the transition regime between VOC- and NO<sub>x</sub>-limited regimes. The limitation of O<sub>3</sub> formation by NO<sub>x</sub> concentration was weakened.

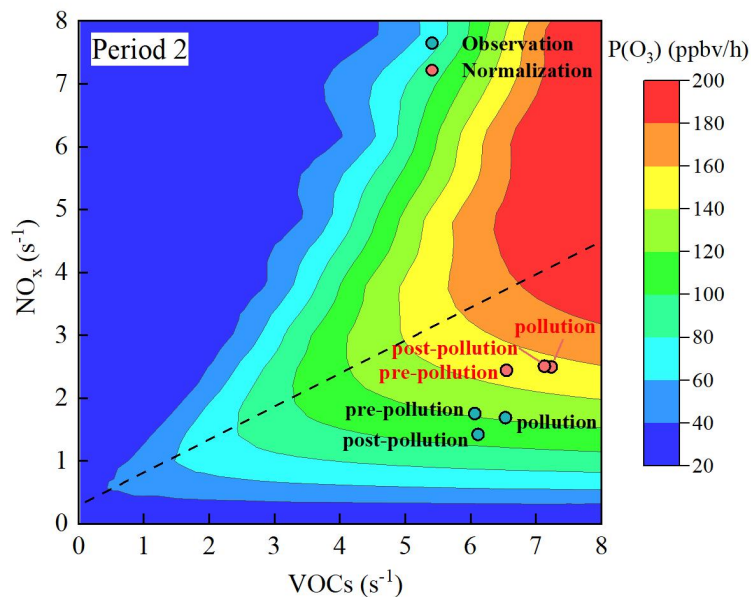

**Figure 6: The O<sub>3</sub> isopleth diagram versus NO<sub>x</sub> and anthropogenic VOCs by using EKMA. The circles represented the average concentrations of NO<sub>x</sub> and VOC during pre-pollution, pollution and post-pollution in the Period 2.**

24. Line 344: “besides, ....” This sentence is unclear to me.

**Response:**

We apologize for any lack of clarity in our expression. We intended to convey that after meteorological normalization, the ozone formation rate P(O<sub>3</sub>) increased. As shown in Figure 6, the red points are located in a yellow background, corresponding to higher P(O<sub>3</sub>) values. We have revised the statement as follows:

After removing the influence of dispersion and transport on O<sub>3</sub> concentrations, the value of P(O<sub>3</sub>) increased, indicating that the P(O<sub>3</sub>) calculated based on observation was likely underestimated.

25. Lines 412-414: It is unclear what the decrease or increase of VOCs is relative to. Is it relative to non-pollution period, or observed concentrations?

**Response:**

We apologize for any unclear expression. We have revised the statement as follows:

During the non-pollution periods, the contributions of solvent use, industrial source and combustion were comparable, accounting for the proportions ranging of 15.6% to 16.2%. Compared to the non-pollution periods, the influence of combustion on VOCs increased (25.1%), while the proportion of industrial source and solvent use decreased during the pollution periods (11% and 11.9%).

26. Lines 417-420: Here, you state that the proportion of industrial emission and solvent use decreased. This does not mean the concentrations of VOCs decrease. So this cannot demonstrate the shutdown measures are effective. I suggest to additionally show the changes of VOCs concentrations from different sources in this Figure or in supplementary materials.

**Response:**

We appreciate the reviewer’s comments. We have shown the variation of VOC concentrations from different sources in Figure 7, where it can be observed that VOCs from industrial emissions and solvent

usage have decreased. We will add the following explanation:

The proportion of industrial emissions and solvent usage decreased during the pollution periods, and the VOC concentrations from these two sources also declined (Fig. 7), indicating that the shutdown or off-peak production measures implemented during pollution warnings were effective in controlling emissions from these sources.

## References

Carslaw, D. C. and Taylor, P. J.: Analysis of air pollution data at a mixed source location using boosted regression trees, *Atmospheric Environment*, 43, 3563-3570, 10.1016/j.atmosenv.2009.04.001, 2009.

Dai, Q., Dai, T., Hou, L., Li, L., Bi, X., Zhang, Y., and Feng, Y.: Quantifying the impacts of emissions and meteorology on the interannual variations of air pollutants in major Chinese cities from 2015 to 2021, *Science China Earth Sciences*, 66, 1725-1737, 10.1007/s11430-022-1128-1, 2023.

Grange, S. K., Carslaw, D. C., Lewis, A. C., Boleti, E., and Hueglin, C.: Random forest meteorological normalisation models for Swiss PM10 trend analysis, *Atmospheric Chemistry and Physics*, 18, 6223-6239, 10.5194/acp-18-6223-2018, 2018.

Liu, B., Wang, Y., Meng, H., Dai, Q., Diao, L., Wu, J., Shi, L., Wang, J., Zhang, Y., and Feng, Y.: Dramatic changes in atmospheric pollution source contributions for a coastal megacity in northern China from 2011 to 2020, *Atmospheric Chemistry and Physics*, 22, 8597-8615, 10.5194/acp-22-8597-2022, 2022.

Liu, Y., Geng, G., Cheng, J., Liu, Y., Xiao, Q., Liu, L., Shi, Q., Tong, D., He, K., and Zhang, Q.: Drivers of Increasing Ozone during the Two Phases of Clean Air Actions in China 2013–2020, *Environmental Science & Technology*, 57, 8954-8964, 10.1021/acs.est.3c00054, 2023.

Song, M., Li, X., Yang, S., Yu, X., Zhou, S., Yang, Y., Chen, S., Dong, H., Liao, K., Chen, Q., Lu, K., Zhang, N., Cao, J., Zeng, L., and Zhang, Y.: Spatiotemporal variation, sources, and secondary transformation potential of volatile organic compounds in Xi'an, China, *Atmospheric Chemistry and Physics*, 21, 4939-4958, 10.5194/acp-21-4939-2021, 2021.

Vu, T. V., Shi, Z., Cheng, J., Zhang, Q., He, K., Wang, S., and Harrison, R. M.: Assessing the impact of clean air action on air quality trends in Beijing using a machine learning technique, *Atmospheric Chemistry and Physics*, 19, 11303-11314, 10.5194/acp-19-11303-2019, 2019.

Yang, J., Zeren, Y., Guo, H., Wang, Y., Lyu, X., Zhou, B., Gao, H., Yao, D., Wang, Z., Zhao, S., Li, J., and Zhang, G.: Wintertime ozone surges: The critical role of alkene ozonolysis, *Environmental Science and Ecotechnology*, 22, 10.1016/j.esc.2024.100477, 2024.
